# Supplementary material
Source: HighWire-hosted journal article supplement (https://bmjopen.bmj.com/content/8/4/e019743)
Supplement: inline-supplementary-material-6 [file inline-supplementary-material-6.pdf]

**Table S2** Summary of methodologies utilised in the included studies (n=28)

| Study                                       | All VARI lab-confirmed | Exposure |     |        | Outcome |     |    |        | Data |     | Analysis at POP level |      |        | Seasonality Adjustment |
|---------------------------------------------|------------------------|----------|-----|--------|---------|-----|----|--------|------|-----|-----------------------|------|--------|------------------------|
|                                             |                        | IFV      | RSV | Others | PD      | IPD | PP | Others | IDNV | POP | CORR                  | REGR | Others |                        |
| Allard et al. 2012 <sup>1</sup>             | Yes, multiple methods  | ✓        |     |        |         | ✓   |    |        |      | ✓   |                       | ✓    |        | ✓                      |
| Ampofo et al. 2008 <sup>2</sup>             | Yes, IF and culture    | ✓        | ✓   | ✓      |         | ✓   |    |        |      | ✓   | ✓                     |      |        |                        |
| Burgos et al. 2015 <sup>3</sup>             | Yes, IF and PCR        | ✓        |     |        |         | ✓   |    |        |      | ✓   | ✓                     | ✓    |        | ✓                      |
| Ciruela et al. 2016 <sup>4</sup>            | Yes, multiple methods  | ✓        | ✓   | ✓      |         | ✓   |    |        |      | ✓   | ✓                     | ✓    |        | ✓                      |
| Dangor et al. 2014 <sup>5</sup>             | Yes, IF and culture    | ✓        |     |        |         | ✓   |    |        |      | ✓   |                       |      | ✓      |                        |
| Domenech de Cellès et al. 2017 <sup>6</sup> | No                     | ✓        |     |        |         | ✓   |    |        |      | ✓   |                       | ✓    | ✓      | ✓                      |
| Edwards et al. 2011 <sup>7</sup>            | Yes, method not known  | ✓        |     |        |         | ✓   |    |        | ✓    |     |                       |      |        |                        |
| Grabowska et al. 2006 <sup>8</sup>          | Yes, multiple methods  | ✓        |     |        |         | ✓   |    |        |      | ✓   |                       | ✓    |        | ✓                      |
| Hendriks et al. 2017 <sup>9</sup>           | No                     | ✓        |     |        |         | ✓   |    |        |      | ✓   |                       |      | ✓      | ✓                      |
| Jansen et al. 2008 <sup>10</sup>            | Yes, multiple methods  | ✓        | ✓   |        |         | ✓   |    | ✓      |      | ✓   | ✓                     |      |        |                        |
| Kim et al. 1996 <sup>11</sup>               | Yes, culture           | ✓        | ✓   | ✓      |         | ✓   |    |        |      | ✓   | ✓                     |      |        |                        |
| Kuster et al. 2011 <sup>12</sup>            | Yes, culture and DAT   | ✓        |     |        |         | ✓   |    |        |      | ✓   |                       | ✓    | ✓      | ✓                      |
| Murdoch et al. 2009 <sup>13</sup>           | Yes, IF and culture    | ✓        | ✓   | ✓      |         | ✓   |    |        |      | ✓   | ✓                     | ✓    |        | ✓                      |
| Nicoli et al. 2013 <sup>14</sup>            | Yes, multiple methods  | ✓        | ✓   |        |         | ✓   |    |        |      | ✓   | ✓                     | ✓    |        | ✓                      |
| O'Brien et al. 2000 <sup>15</sup>           | Yes, serology          | ✓        |     |        |         |     | ✓  |        | ✓    |     |                       |      |        | ✓                      |
| Opatowski et al. 2013 <sup>16</sup>         | No                     |          |     | ✓      |         |     |    | ✓      |      | ✓   |                       | ✓    | ✓      | ✓                      |
| Peltola et al. 2011 <sup>17</sup>           | Yes, multiple methods  | ✓        | ✓   | ✓      |         | ✓   |    |        |      | ✓   | ✓                     |      |        |                        |
| Shrestha et al. 2013 <sup>18</sup>          | No                     | ✓        |     |        |         |     | ✓  |        |      | ✓   |                       |      | ✓      |                        |
| Stensballe et al. 2008 <sup>19</sup>        | No                     |          | ✓   | ✓      |         | ✓   |    |        | ✓    | ✓   | ✓                     |      |        |                        |
| Talbot et al. 2005 <sup>20</sup>            | Yes, culture and RAT   | ✓        | ✓   |        |         | ✓   |    |        |      | ✓   | ✓                     |      |        |                        |
| Toschke et al. 2008 <sup>21</sup>           | Yes, PCR               | ✓        |     |        |         | ✓   |    |        |      | ✓   |                       |      | ✓      |                        |
| Walter et al. 2010 <sup>22</sup>            | Yes, method not known  | ✓        |     |        |         | ✓   |    | ✓      |      | ✓   |                       | ✓    |        | ✓                      |
| Watson et al. 2006 <sup>23</sup>            | Yes, DAT               | ✓        | ✓   | ✓      |         | ✓   |    |        |      | ✓   | ✓                     |      |        |                        |
| Weinberger et al. 2014 <sup>24</sup>        | No                     | ✓        | ✓   |        |         | ✓   |    | ✓      |      | ✓   |                       | ✓    |        | ✓                      |
| Weinberger et al. 2013 <sup>25</sup>        | No                     | ✓        |     |        |         |     |    | ✓      |      | ✓   |                       | ✓    |        | ✓                      |
| Weinberger et al. 2014 <sup>26</sup>        | No                     | ✓        |     |        |         | ✓   | ✓  |        |      | ✓   |                       | ✓    |        | ✓                      |
| Weinberger et al. 2015 <sup>27</sup>        | No                     | ✓        | ✓   |        | ✓       |     | ✓  | ✓      |      | ✓   |                       | ✓    |        | ✓                      |
| Zhou et al. 2012 <sup>28</sup>              | Yes, method not known  | ✓        | ✓   |        |         |     |    |        |      | ✓   |                       | ✓    |        | ✓                      |

CORR, correlation; DAT, direct antigen test; IF, immunofluorescence; IFV, influenza virus; INDV, individual; IPD, invasive pneumococcal disease; PCR, polymerase chain reaction; PD, pneumococcal disease; POP, population; PP, pneumococcal pneumonia; REGR, regression; RAT, rapid antigen test; RSV, respiratory syncytial virus; VARI, viral acute respiratory infection.

## Reference

1. Allard R, Couillard M, Pilon P, et al. Invasive bacterial infections following influenza: a time-series analysis in Montreal, Canada, 1996-2008. *Influenza other respi* 2012;6(4):268-75.
2. Ampofo K, Bender J, Sheng X, et al. Seasonal invasive pneumococcal disease in children: role of preceding respiratory viral infection. *Pediatrics* 2008;122(2):229-37.
3. Burgos J, Larrosa MN, Martinez A, et al. Impact of influenza season and environmental factors on the clinical presentation and outcome of invasive pneumococcal disease. *Eur J Clin Microbiol Infect Dis* 2015;34(1):177-86.
4. Ciruela P, Broner S, Izquierdo C, et al. Invasive pneumococcal disease rates linked to meteorological factors and respiratory virus circulation (Catalonia, 2006-2012). *BMC Public Health* 2016;16(400).
5. Dangor Z, Izu A, Moore DP, et al. Temporal association in hospitalizations for tuberculosis, invasive pneumococcal disease and influenza virus illness in South African children. *PLoS ONE* 2014;9(3):e91464.
6. Domenech de Cellès M, Arduin H, Varon E, et al. Characterizing and Comparing the Seasonality of Influenza-Like Illnesses and Invasive Pneumococcal Diseases Using Seasonal Waveforms. *Am J Epidemiol* 2017;kwx336-kwx36.
7. Edwards LJ, Markey PG, Cook HM, et al. The relationship between influenza and invasive pneumococcal disease in the Northern Territory, 2005-2009. *Med J Aust* 2011;194(4):207.
8. Grabowska K, Hogberg L, Penttinen P, et al. Occurrence of invasive pneumococcal disease and number of excess cases due to influenza. *BMC Infect Dis* 2006;6:58.
9. Hendriks W, Boshuizen H, Dekkers A, et al. Temporal cross-correlation between influenza-like illnesses and invasive pneumococcal disease in The Netherlands. *Influenza and other Respiratory Viruses* 2017;11(2):130-37.
10. Jansen AG, Sanders EA, A VDE, et al. Invasive pneumococcal and meningococcal disease: association with influenza virus and respiratory syncytial virus activity? *Epidemiol Infect* 2008;136(11):1448-54.
11. Kim PE, Musher DM, Glezen WP, et al. Association of invasive pneumococcal disease with season, atmospheric conditions, air pollution, and the isolation of respiratory viruses. *Clin Infect Dis* 1996;22(1):100-6.
12. Kuster SP, Tuite AR, Kwong JC, et al. Evaluation of coseasonality of influenza and invasive pneumococcal disease: results from prospective surveillance. *PLoS Med* 2011;8(6):e1001042.
13. Murdoch DR, Jennings LC. Association of respiratory virus activity and environmental factors with the incidence of invasive pneumococcal disease. *J Infect* 2009;58(1):37-46.
14. Nicoli EJ, Trotter CL, Turner KM, et al. Influenza and RSV make a modest contribution to invasive pneumococcal disease incidence in the UK. *J Infect* 2013;66(6):512-20.
15. O'Brien KL, Walters MI, Sellman J, et al. Severe pneumococcal pneumonia in previously healthy children: the role of preceding influenza infection. *Clin Infect Dis* 2000;30(5):784-9.
16. Opatowski L, Varon E, Dupont C, et al. Assessing pneumococcal meningitis association with viral respiratory infections and antibiotics: insights from statistical and mathematical models. *Proc Biol Sci* 2013;280(1764):20130519.
17. Peltola V, Heikkinen T, Ruuskanen O, et al. Temporal association between rhinovirus circulation in the community and invasive pneumococcal disease in children. *Pediatr Infect Dis J* 2011;30(6):456-61.
18. Shrestha S, Foxman B, Weinberger DM, et al. Identifying the interaction between influenza and pneumococcal pneumonia using incidence data. *Sci Transl Med* 2013;5(191):191ra84.
19. Stensballe LG, Hjuler T, Andersen A, et al. Hospitalization for respiratory syncytial virus infection and invasive pneumococcal disease in Danish children aged <2 years: a population-based cohort study. *Clin Infect Dis* 2008;46(8):1165-71.
20. Talbot TR, Poehling KA, Hartert TV, et al. Seasonality of invasive pneumococcal disease: temporal relation to documented influenza and respiratory syncytial viral circulation. *Am J Med* 2005;118(3):285-91.

21. Toschke AM, Arenz S, von Kries R, et al. No temporal association between influenza outbreaks and invasive pneumococcal infections. *Arch Dis Child* 2008;93(3):218-20.
22. Walter ND, Taylor TH, Shay DK, et al. Influenza circulation and the burden of invasive pneumococcal pneumonia during a non-pandemic period in the United States. *Clin Infect Dis* 2010;50(2):175-83.
23. Watson M, Gilmour R, Menzies R, et al. The association of respiratory viruses, temperature, and other climatic parameters with the incidence of invasive pneumococcal disease in Sydney, Australia. *Clin Infect Dis* 2006;42(2):211-5.
24. Weinberger DM, Grant LR, Steiner CA, et al. Seasonal drivers of pneumococcal disease incidence: impact of bacterial carriage and viral activity.[Erratum appears in *Clin Infect Dis*. 2014 Mar;58(6):908]. *Clin Infect Dis* 2014;58(2):188-94.
25. Weinberger DM, Harboe ZB, Viboud C, et al. Serotype-specific effect of influenza on adult invasive pneumococcal pneumonia. *J Infect Dis* 2013;208(8):1274-80.
26. Weinberger DM, Harboe ZB, Viboud C, et al. Pneumococcal disease seasonality: incidence, severity and the role of influenza activity. *Eur Respir J* 2014;43(3):833-41.
27. Weinberger DM, Klugman KP, Steiner CA, et al. Association between respiratory syncytial virus activity and pneumococcal disease in infants: a time series analysis of US hospitalization data. *PLoS Med* 2015;12(1):e1001776.
28. Zhou H, Haber M, Ray S, et al. Invasive pneumococcal pneumonia and respiratory virus co-infections. *Emerg Infect Dis* 2012;18(2):294-7.
